# Supplementary material for: C4 trees have a broader niche than their close C3 relatives
Source: PubMed Central journal article supplement (PMC9126736; doi:10.1093/jxb/erac113), 2022-05-23
Supplement: erac113_suppl_supplementary-material.pdf [file erac113_suppl_supplementary-material.pdf]

## **Supplementary material for:**

### **C<sub>4</sub> trees have broader niches than their close C<sub>3</sub> relatives**

Sophie N. R. Young, Luke T. Dunning, Hui Liu, Carly J. Stevens, Marjorie R. Lundgren

#### CONTENTS:

##### **Supplementary Figures**

Fig S1. Map of occurrence data flagged by CoordinateCleaner

Fig S2. Map of occurrence data by data source

Fig S3. Map of distributions of Hawaiian herbs, shrubs and trees by photosynthetic type

Fig S4. Complete phylogeny of all species whose data was obtained in this study

Fig S5. Principal components 1 and 2 of a Principal Component Analysis (PCA) of environmental variables for all growth forms

Fig S6. Principal components 3 and 4 of a Principal Component Analysis (PCA) of environmental variables for all growth forms

Fig S7. Principal Component Analysis (PCA) of soil variables for C<sub>3</sub> and C<sub>4</sub> trees

Fig S8. Histogram of principal component 3 of a Principal Component Analysis (PCA) of environmental variables for C<sub>3</sub> and C<sub>4</sub> trees.

Fig S9. Distribution of C<sub>3</sub> and C<sub>4</sub> trees by elevation and environmental variables correlated with elevation.

##### **Supplementary Tables**

Table S1. Issues identified by GBIF which resulted in a record being removed from this analysis

Table S2. Summary of sequence data used and accession numbers

Table S3. Environmental variables correlated to PCA axes (trees only)

Table S4. Environmental variables correlated to PCA axes (all lifeforms)

Table S5. Soil variables correlated to PCA axes (trees only)

**Figure S1**

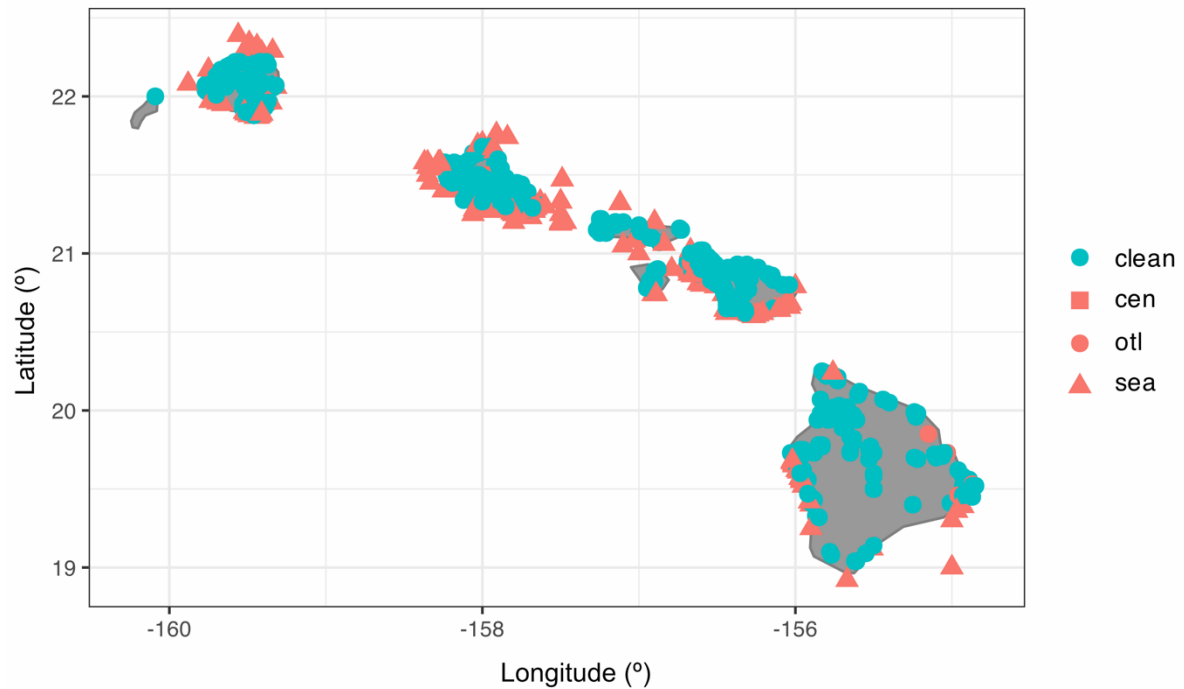

**Fig S1. Map of occurrence data flagged by CoordinateCleaner.** Occurrence data for species in Euphorbiaceae on the Hawaiian Islands were processed using the CoordinateCleaner package in R. 277 coordinates were flagged (pink) including those located on country centroids (cen,  $n = 1$ , squares), species outliers (otl,  $n = 22$ , circles), or in the sea (sea,  $n = 262$ , triangles), and removed prior to further analysis. Remaining coordinates ( $n = 1091$ ) are designated as ‘clean’ (blue circles).

**Figure S2**

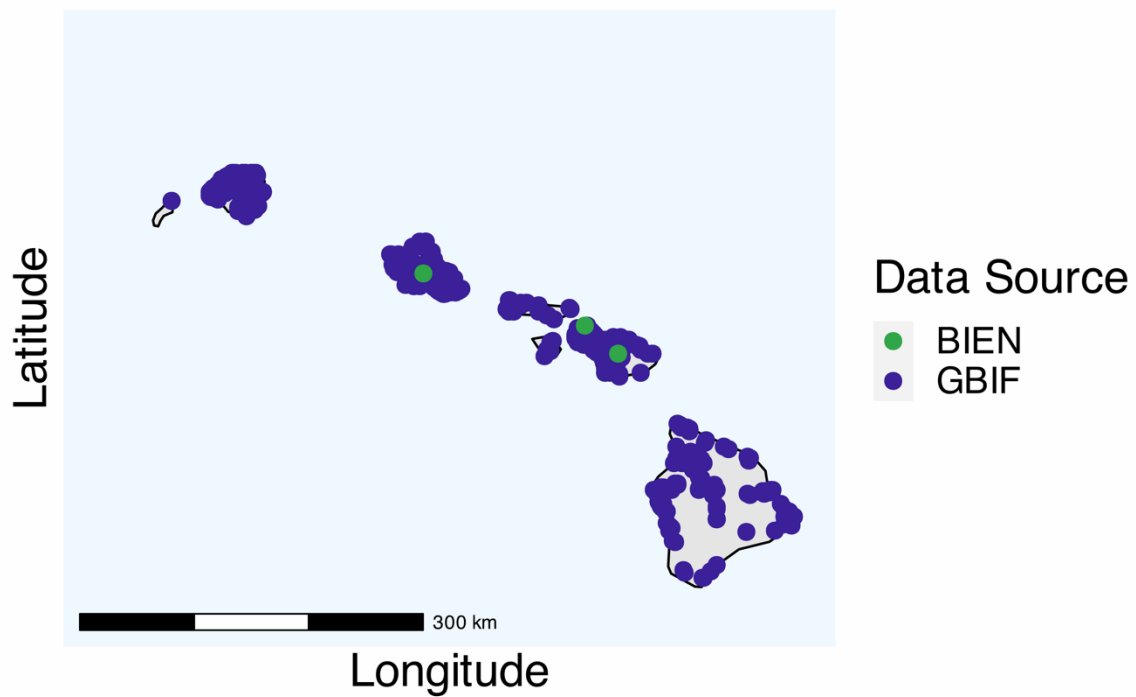

**Fig S2. Map of occurrence data by data source.** Cleaned occurrence data are shown for species in Euphorbiaceae that were obtained from either the Botanical Information and Ecology Network (BIEN,  $n = 3$ , green) or the Global Biodiversity Information Facility (GBIF,  $n = 687$ , blue). Duplicate records (*i.e.* those that appeared in both datasets, or twice in one dataset) have been removed.

**Figure S3**

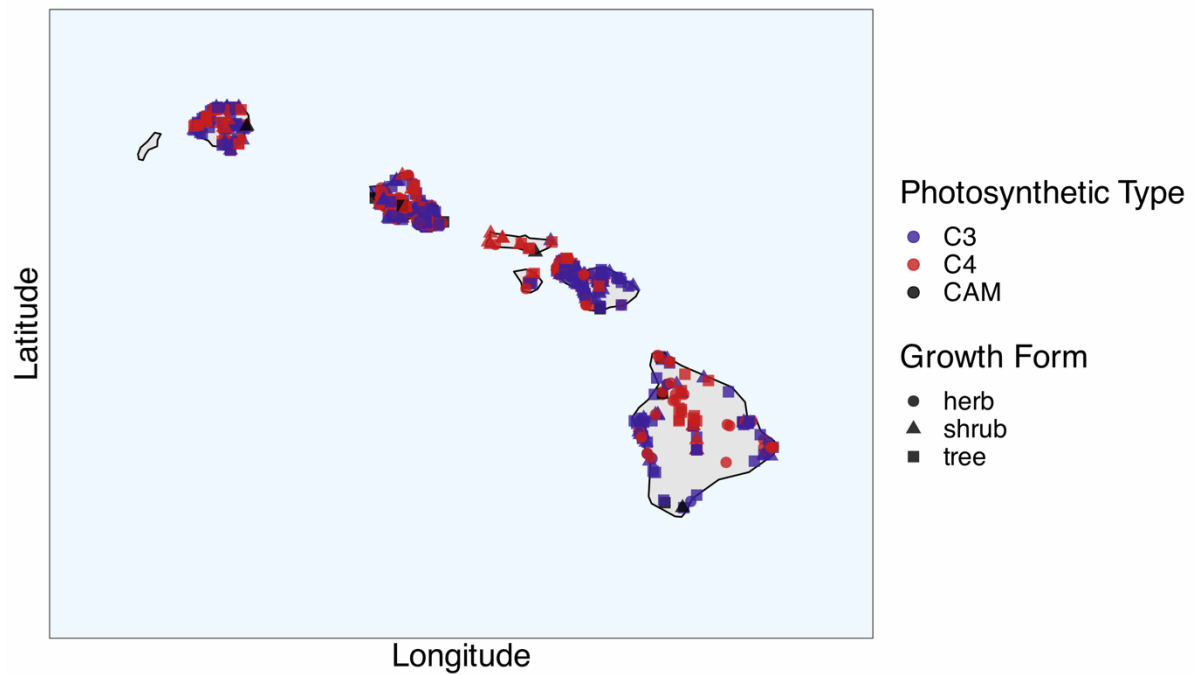

**Fig S3. Map of distributions of Hawaiian herbs, shrubs and trees by photosynthetic type.**

Occurrence data for herbs (n = 199, representing 9 species, circles), shrubs (n = 170, representing 18 species, triangles) and trees (n = 283, representing 25 species, squares) in Euphorbiaceae are shown on a map of the Hawaiian Islands. Points are coloured according to the photosynthetic type assigned to each species: C<sub>3</sub> (blue), C<sub>4</sub> (red) or CAM (black).

**Figure S4**

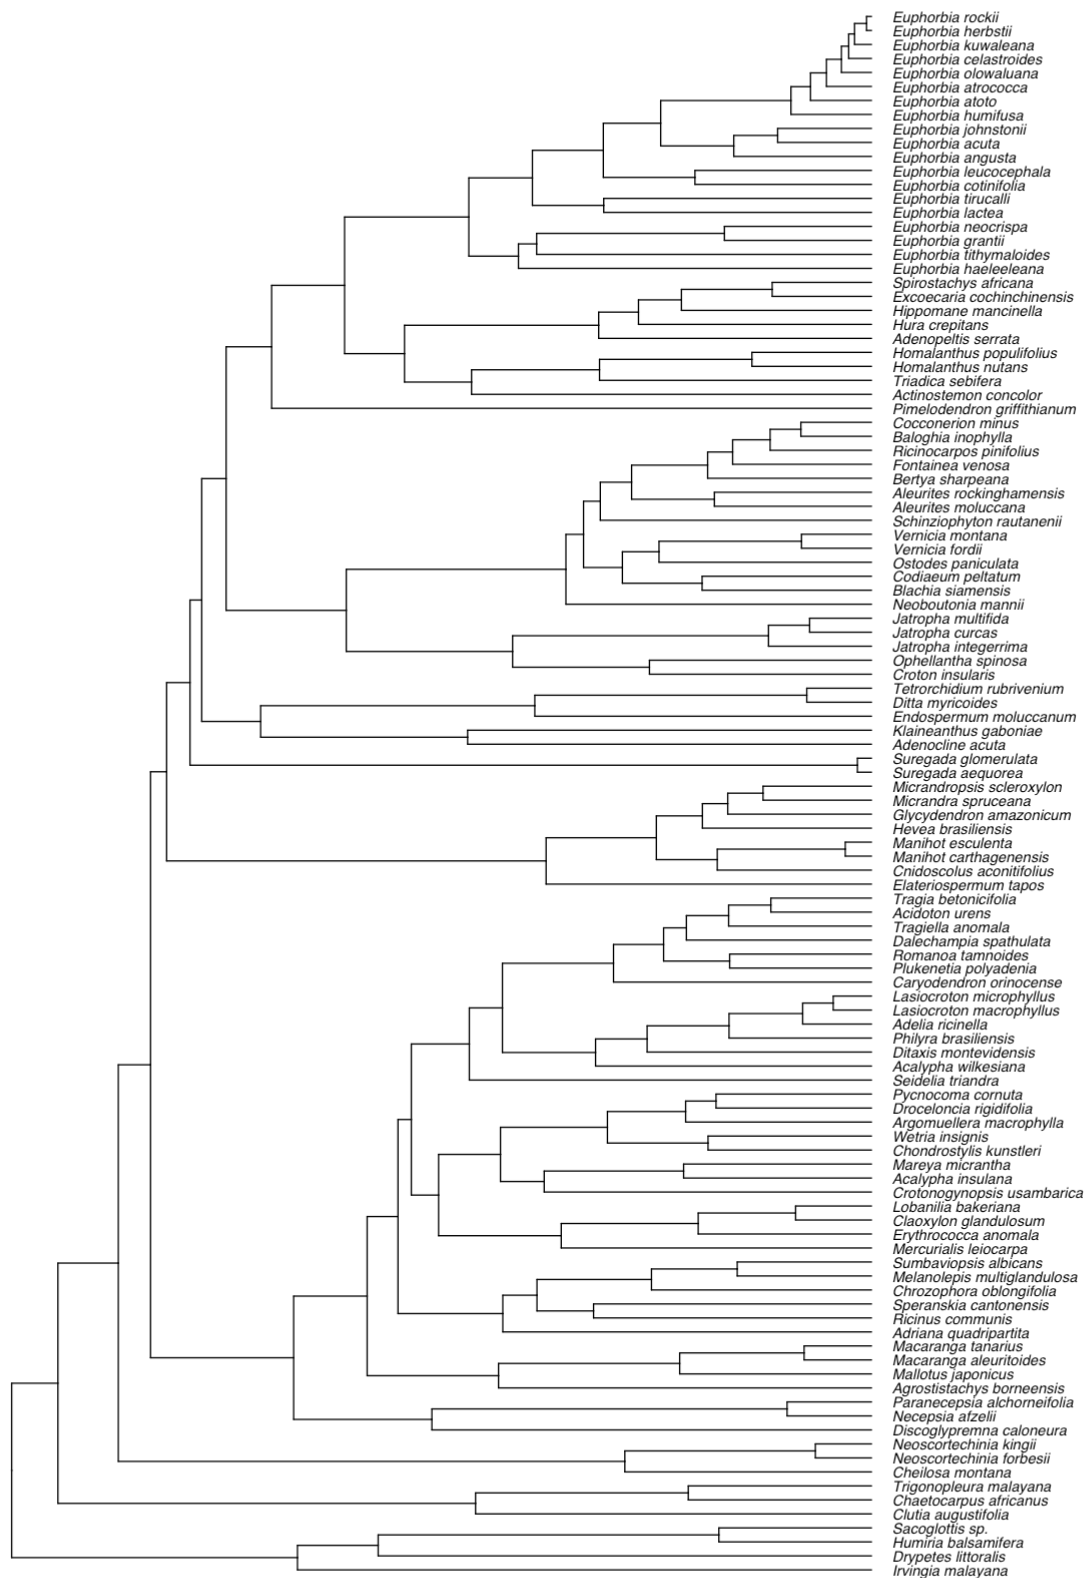

**Fig S4.** Complete phylogeny of all species whose data was obtained in this study. Phylogenetic tree generated using previously published data for 112 species in Euphorbiaceae.

Figure S5

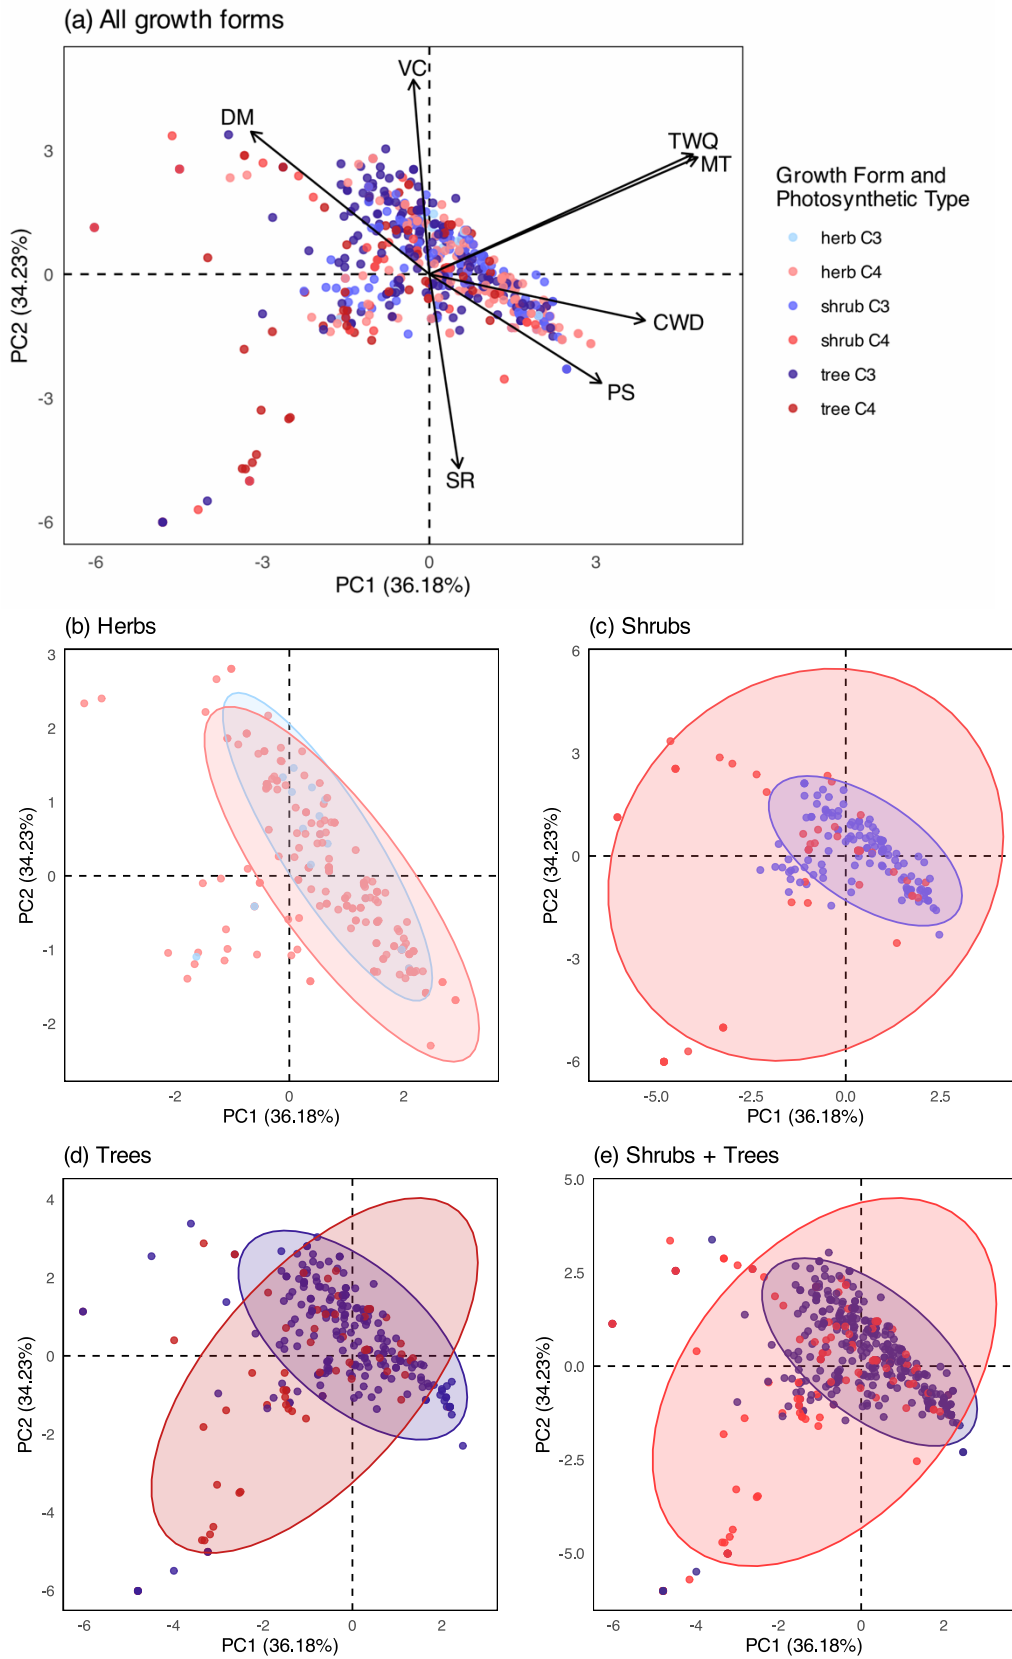

**Fig S5. Principal components 1 and 2 of a Principal Component Analysis (PCA) of environmental variables for all growth forms.** (a) PCA plot showing C<sub>3</sub> (blue) and C<sub>4</sub> (red) herb, shrub, and tree species in Euphorbiaceae. Arrows show the loading of each of the 7 environmental variables used in the PCA. Abbreviations are as follows: MT=minimum temperature of the coldest month, TWQ= temperature of the wettest quarter, DM=precipitation of the driest month, PS=precipitation seasonality, SR=solar radiation, VC=vegetation cover, CWD=climatic water deficit. Data are also shown on individual plots separated by growth form, with 95% confidence ellipses calculated for each group. (b) C<sub>3</sub> (n = 21) and C<sub>4</sub> (n = 178) herbaceous species, (c) C<sub>3</sub> (n = 119) and C<sub>4</sub> (n = 47) shrub species, C<sub>3</sub> (n = 202) and C<sub>4</sub> (n = 66) tree species, and (e) C<sub>3</sub> (n = 331) and C<sub>4</sub> (n = 113) woody (herb and shrub) species.

**Figure S6**

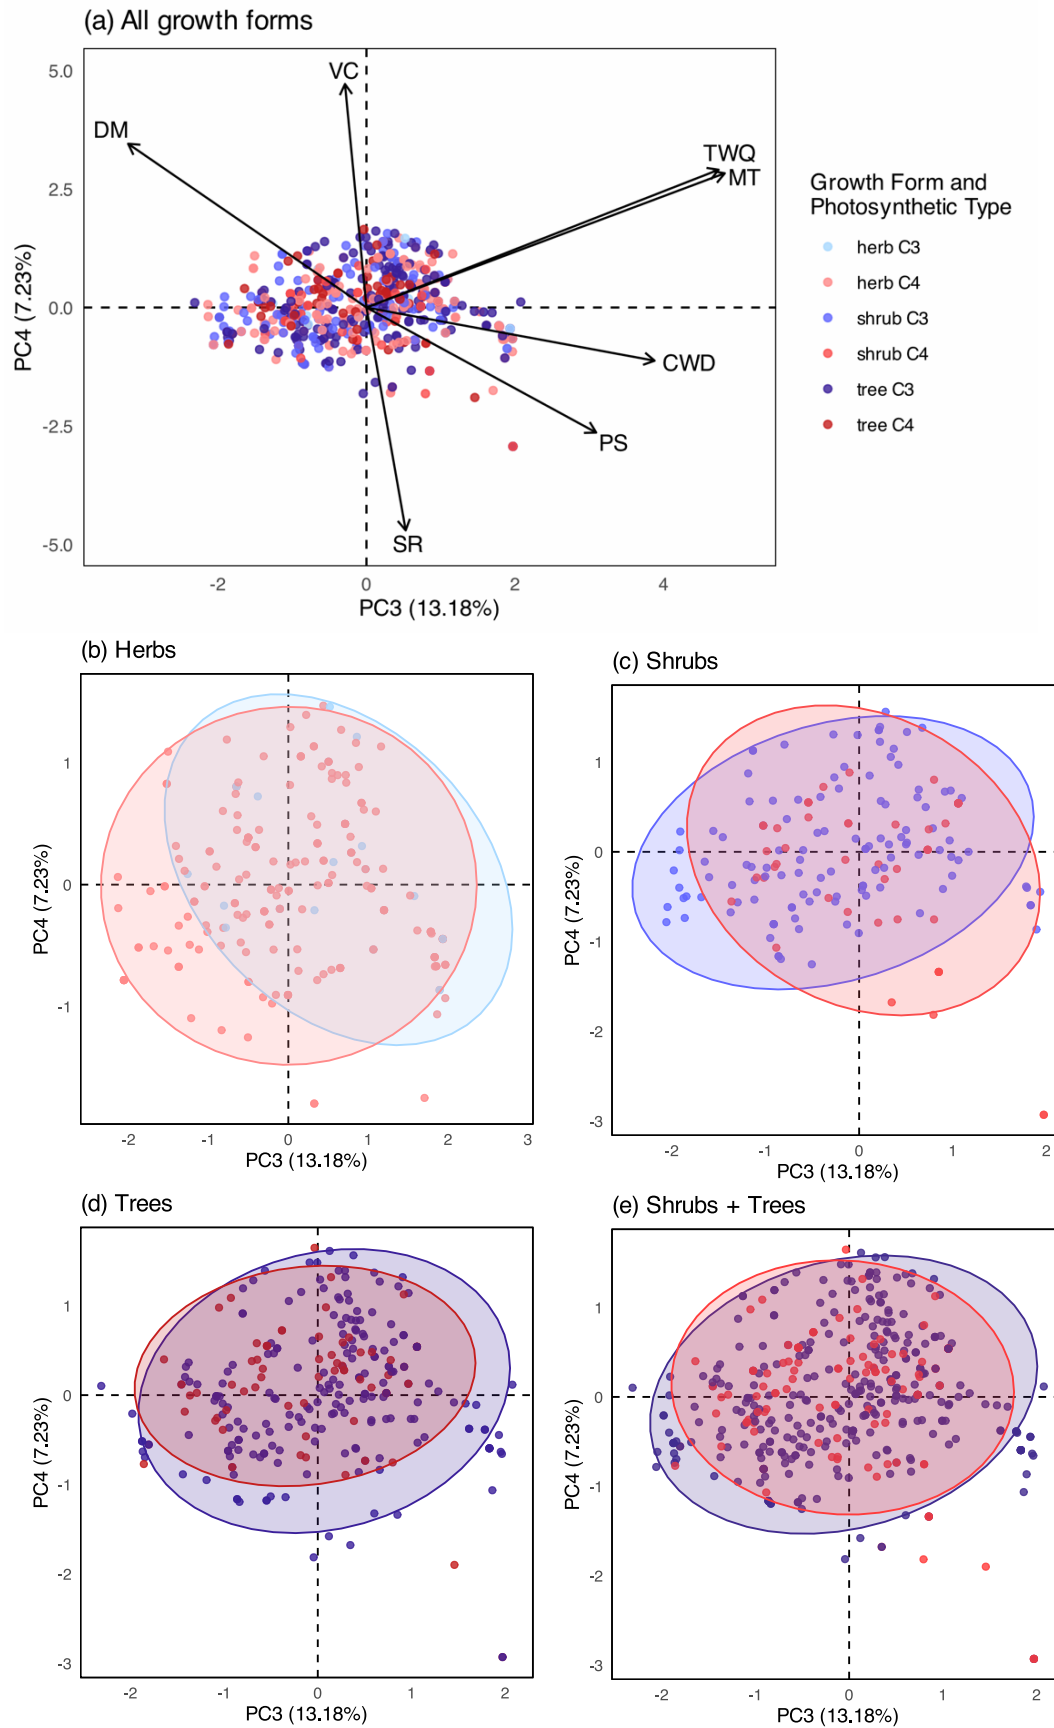



**Fig S6. Principal components 3 and 4 of a Principal Component Analysis (PCA) of environmental variables for all growth forms.** (a) PCA plot showing C<sub>3</sub> (blue) and C<sub>4</sub> (red) herb, shrub, and tree species in Euphorbiaceae. Arrows show the loading of each of the 7 environmental variables used in the PCA. Abbreviations are as follows: MT=minimum temperature of the coldest month, TWQ= temperature of the wettest quarter, DM=precipitation of the driest month, PS=precipitation seasonality, SR=solar radiation, VC=vegetation cover, CWD=climatic water deficit. Data are also shown on individual plots separated by growth form, with 95% confidence ellipses calculated for each group. (b) C<sub>3</sub> (n = 21) and C<sub>4</sub> (n = 178) herbaceous species, (c) C<sub>3</sub> (n = 119) and C<sub>4</sub> (n = 47) shrub species, C<sub>3</sub> (n = 202) and C<sub>4</sub> (n = 66) tree species, and (e) C<sub>3</sub> (n = 331) and C<sub>4</sub> (n = 113) woody (herb and shrub) species.

**Figure S7**

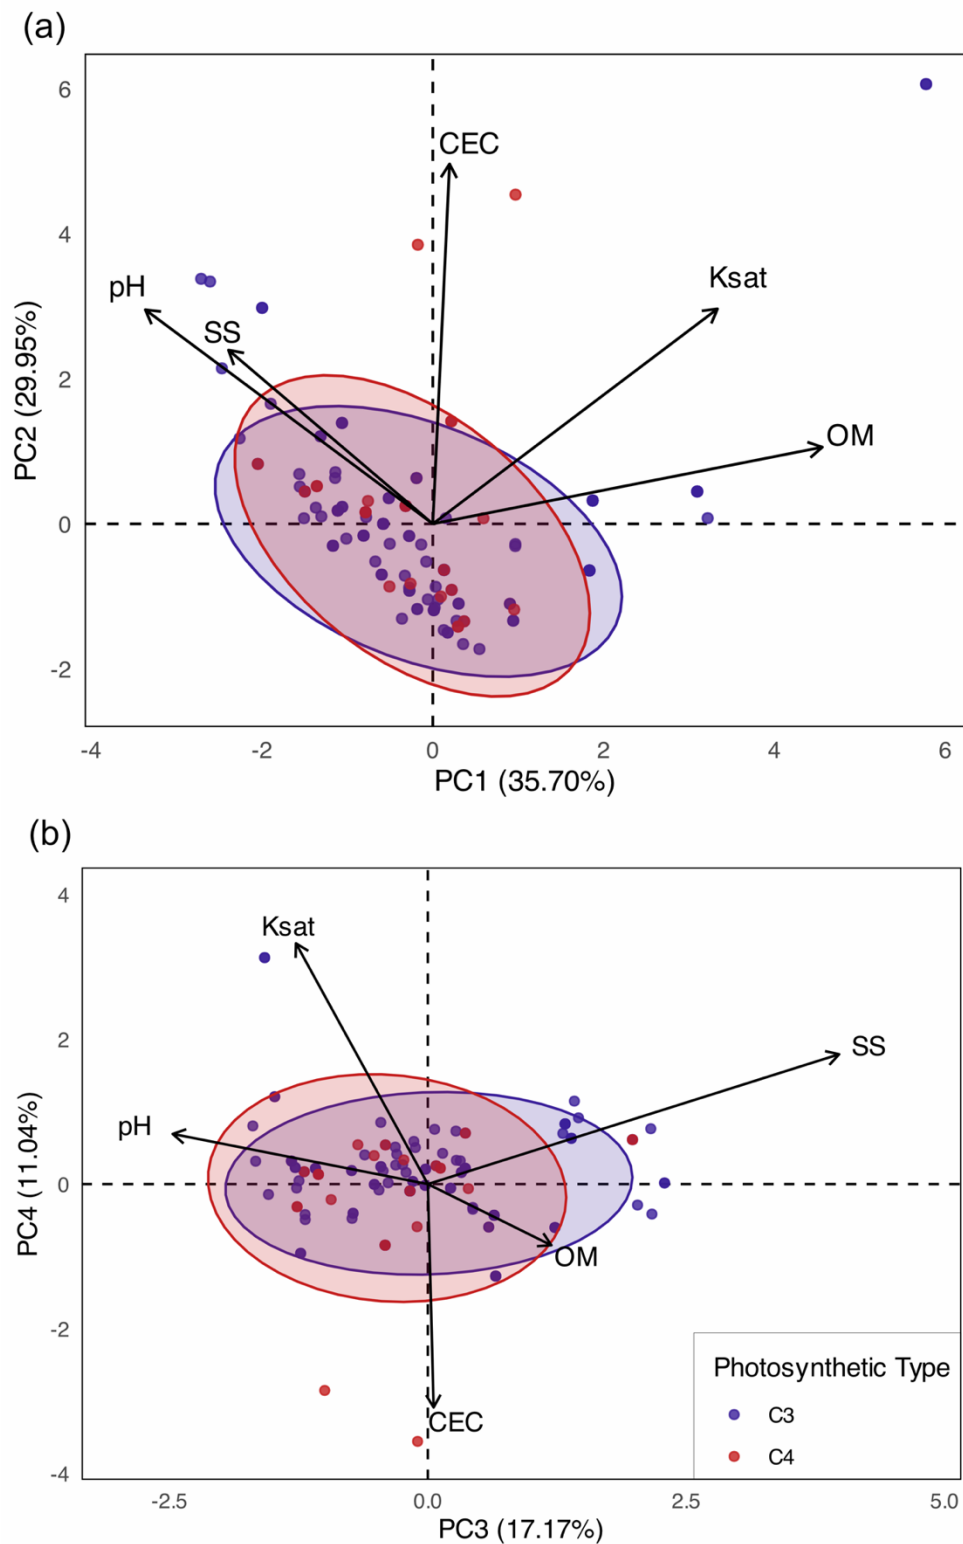

**Fig S7. Principal component analysis (PCA) of soil variables for C<sub>3</sub> and C<sub>4</sub> trees.** (a) Principal Components (PCs) 1 and 2, and, (b) PCs 3 and 4 of a PCA conducted on 5 soil variables for C<sub>3</sub> (blue) and C<sub>4</sub> (red) trees. Arrows show the loading of each of the 5 variables. Abbreviations are as follows: CEC = cation exchange capacity, Ksat = water permeability, SS = shrink-swell potential (soil stability), OM = organic matter. 95% confidence ellipses were calculated for each group.

**Figure S8**

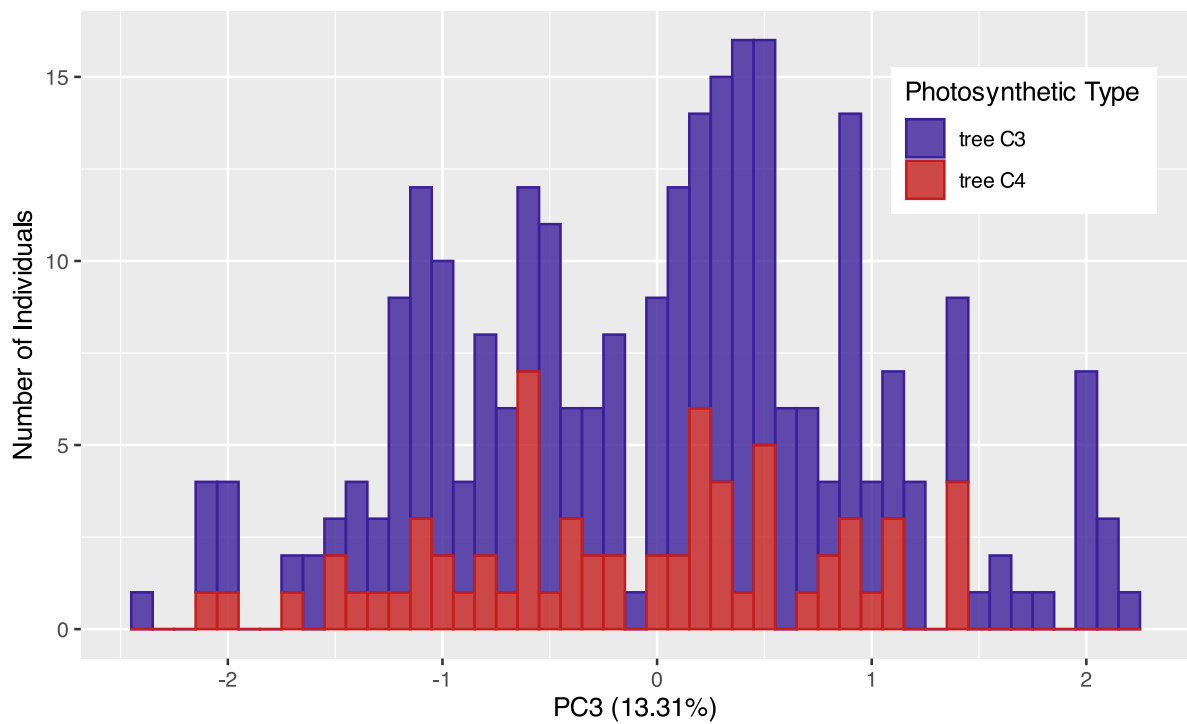

**Fig S8. Histogram of Principal Component 3 of a Principal Component Analysis (PCA) of environmental variables for C<sub>3</sub> and C<sub>4</sub> trees.** Histogram showing C<sub>3</sub> (blue, n = 202) and C<sub>4</sub> (red, n = 66) tree species in Euphorbiaceae.

**Figure S9**

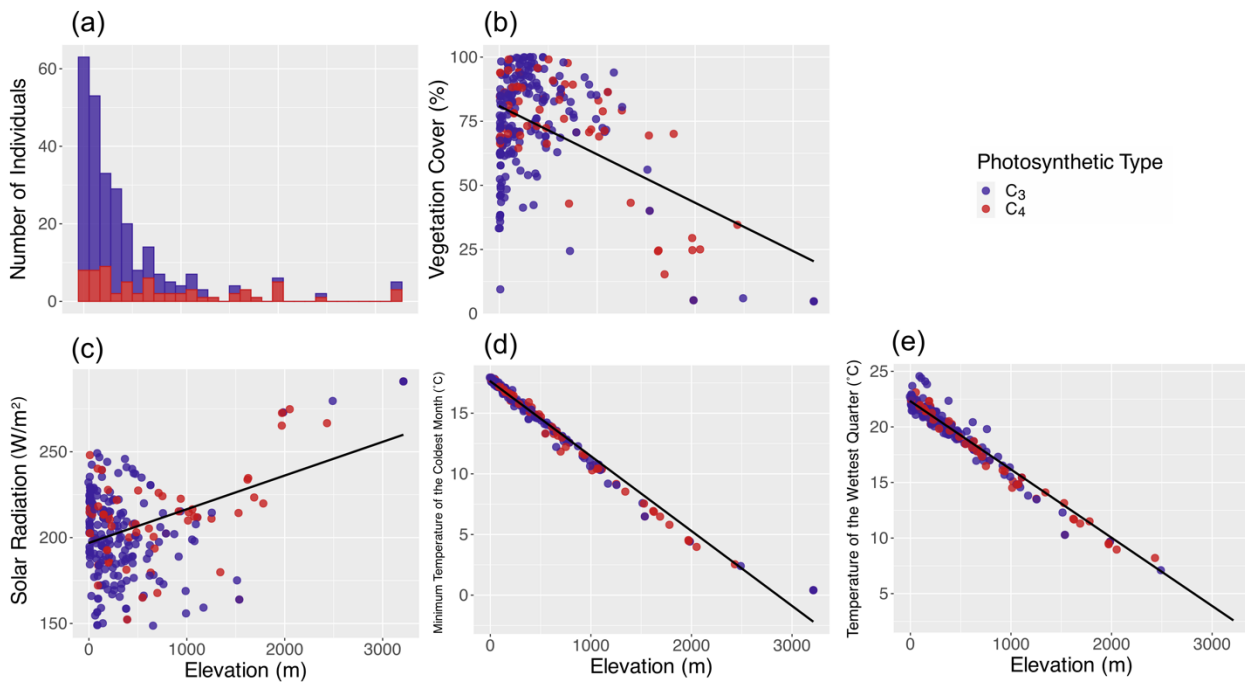

**Fig S9. Distribution of C<sub>3</sub> and C<sub>4</sub> trees by elevation, and environmental variables correlated with elevation.** (a) Histogram of the distribution of C<sub>3</sub> (blue) and C<sub>4</sub> (red) trees by elevation. Scatterplots of the relationship between elevation and 4 environmental variables are shown: (b) vegetation cover, (c) solar radiation, (d) minimum temperature of the coldest month and (e) temperature of the wettest quarter. Linear regression lines (black) were fitted to the data in plots b-e.

## SUPPLEMENTARY TABLES

**Table S1. Issues identified by GBIF which resulted in a record being removed from this analysis**

| <b>code</b> | <b>issue</b>                 | <b>description</b>                                                                  | <b>type</b> |
|-------------|------------------------------|-------------------------------------------------------------------------------------|-------------|
| conti       | CONTINENT_INVALID            | Uninterpretable continent values found.                                             | occurrence  |
| cucdmis     | COUNTRY_COORDINATE_MISMATCH  | The interpreted occurrence coordinates fall outside of the indicated country.       | occurrence  |
| cuiv        | COUNTRY_INVALID              | Uninterpretable country values found.                                               | occurrence  |
| cum         | COUNTRY_MISMATCH             | Interpreted country for dwc:country and dwc:countryCode contradict each other.      | occurrence  |
| preneglat   | PRESUMED_NEGATED_LATITUDE    | Latitude appears to be negated, e.g. 32.3 instead of -32.3                          | occurrence  |
| preneglon   | PRESUMED_NEGATED_LONGITUDE   | Longitude appears to be negated, e.g. 32.3 instead of -32.3                         | occurrence  |
| preswcd     | PRESUMED_SWAPPED_COORDINATE  | Latitude and longitude appear to be swapped.                                        | occurrence  |
| txmatfuz    | TAXON_MATCH_FUZZY            | Matching to the taxonomic backbone can only be done using a fuzzy, non-exact match. | occurrence  |
| cdpi        | COORDINATE_PRECISION_INVALID | Indicates an invalid or very unlikely coordinatePrecision                           | occurrence  |

**Table S2. summary of sequence data used and accession numbers**

| Species                           | rbcL        |           | matK        |           | trnL        |           | Total (bp) |
|-----------------------------------|-------------|-----------|-------------|-----------|-------------|-----------|------------|
|                                   | Length (bp) | Accession | Length (bp) | Accession | Length (bp) | Accession |            |
| <i>Acalypha insulana</i>          | 1331        | AB233854  | 1203        | AB233750  | 0           | -         | 2534       |
| <i>Acalypha wilkesiana</i>        | 599         | KU243027  | 0           | -         | 0           | -         | 599        |
| <i>Acidoton urens</i>             | 1321        | AB267913  | 1194        | AB268017  | 0           | -         | 2515       |
| <i>Actinostemon concolor</i>      | 1324        | AB233883  | 1203        | AB233779  | 0           | -         | 2527       |
| <i>Adelia ricinella</i>           | 1315        | AB267914  | 1203        | AB268018  | 1016        | AY794737  | 3534       |
| <i>Adenocline acuta</i>           | 1325        | AB233874  | 1197        | AB233770  | 0           | -         | 2522       |
| <i>Adenopeltis serrata</i>        | 1324        | AB267954  | 1203        | AB268058  | 791         | AY794633  | 3318       |
| <i>Adriana quadripartita</i>      | 1325        | AB233855  | 1206        | AB233751  | 0           | -         | 2531       |
| <i>Agrostistachys borneensis</i>  | 1331        | AB233856  | 1203        | AB233752  | 0           | -         | 2534       |
| <i>Aleurites moluccana</i>        | 1321        | AY794883  | 1218        | LK021377  | 904         | AY794709  | 3443       |
| <i>Aleurites rockinghamensis</i>  | 0           | -         | 0           | -         | 743         | KC428437  | 743        |
| <i>Argomuelleria macrophylla</i>  | 1325        | AB267915  | 1203        | AB268019  | 986         | AY794769  | 3514       |
| <i>Baloghia inophylla</i>         | 1331        | AB233875  | 1203        | AB233771  | 899         | AY794707  | 3433       |
| <i>Bertya sharpeana</i>           | 1324        | AB267935  | 1215        | AB268039  | 0           | -         | 2539       |
| <i>Blachia siamensis</i>          | 1324        | AB267936  | 1203        | AB268040  | 873         | AY794727  | 3400       |
| <i>Caryodendron orinocense</i>    | 1325        | AB233857  | 1203        | AB233753  | 997         | AY794760  | 3525       |
| <i>Chaetocarpus africanus</i>     | 1325        | AB233858  | 1191        | AB233754  | 854         | AY794809  | 3370       |
| <i>Cheilosa montana</i>           | 1331        | AB267910  | 1203        | AB268014  | 0           | -         | 2534       |
| <i>Chondrostylis kunstleri</i>    | 1331        | AB233859  | 1203        | AB233755  | 0           | -         | 2534       |
| <i>Chrozophora oblongifolia</i>   | 1325        | AB233860  | 1203        | AB233756  | 0           | -         | 2528       |
| <i>Claoxylon glandulosum</i>      | 0           | -         | 1209        | LK021406  | 998         | HG971843  | 2207       |
| <i>Clutia augustifolia</i>        | 1321        | AB233861  | 1191        | AB233757  | 0           | -         | 2512       |
| <i>Cnidioscolus aconitifolius</i> | 1325        | AB267937  | 1203        | AB268041  | 946         | MH935283  | 3474       |
| <i>Cocconerion minus</i>          | 1323        | AB267938  | 1203        | AB268042  | 0           | -         | 2526       |
| <i>Codiaeum peltatum</i>          | 1331        | AB233876  | 1203        | AB233772  | 0           | -         | 2534       |
| <i>Croton insularis</i>           | 1331        | AB233877  | 1203        | AB233773  | 697         | AY971308  | 3231       |
| <i>Crotonogynopsis usambarica</i> | 1331        | AB233862  | 1209        | AB233758  | 1008        | HG971853  | 3548       |
| <i>Dalechampia spathulata</i>     | 1331        | AB233863  | 1188        | AB233759  | 1080        | Y794754   | 3599       |
| <i>Discoglypsemna caloneura</i>   | 1324        | AB267916  | 1209        | AB268020  | 1095        | AY794802  | 3628       |
| <i>Ditaxis montevidensis</i>      | 1324        | AB233865  | 1203        | AB233761  | 0           | -         | 2527       |
| <i>Ditta myricoides</i>           | 1311        | AB267939  | 1212        | AB268043  | 1006        | AY794675  | 3529       |
| <i>Droceloncia rigidifolia</i>    | 1318        | AB267917  | 1203        | AB268021  | 0           | -         | 2521       |
| <i>Drypetes littoralis</i>        | 1331        | AB233926  | 1203        | AB233822  | 0           | -         | 2534       |
| <i>Elateriospermum tapos</i>      | 1322        | AB267940  | 1203        | AB268044  | 964         | AY794678  | 3489       |
| <i>Endospermum moluccanum</i>     | 1331        | AB267941  | 1206        | AB268045  | 976         | AY794671  | 3513       |
| <i>Erythrocoeca anomala</i>       | 1324        | AB267918  | 1215        | AB268022  | 0           | -         | 2539       |
| <i>Euphorbia acuta</i>            | 1300        | JN249261  | 1203        | HQ645674  | 982         | JN249596  | 3485       |
| <i>Euphorbia angusta</i>          | 0           | -         | 1203        | HQ645678  | 381         | HQ645528  | 1584       |
| <i>Euphorbia atoto</i>            | 1331        | AB267955  | 1203        | AB268059  | 402         | HQ645536  | 2936       |

| Species                            | rbcL        |            | matK        |           | trnL        |           | Total (bp) |
|------------------------------------|-------------|------------|-------------|-----------|-------------|-----------|------------|
|                                    | Length (bp) | Accession  | Length (bp) | Accession | Length (bp) | Accession |            |
| <i>Euphorbia_atrococca</i>         | 0           | -          | 0           | -         | 1031        | MH490365  | 1031       |
| <i>Euphorbia_celastroides</i>      | 1106        | JN249280   | 1203        | HQ645698  | 1053        | JN249615  | 3362       |
| <i>Euphorbia_grantii</i>           | 1331        | AB233888   | 1200        | AB233784  | 1032        | JN249654  | 3563       |
| <i>Euphorbia_haeleeleana</i>       | 0           | -          | 1221        | KC019490  | 0           | -         | 1221       |
| <i>Euphorbia_herbstii</i>          | 0           | -          | 0           | -         | 1036        | MH490446  | 1036       |
| <i>Euphorbia_humifusa</i>          | 1331        | AB233884   | 1203        | AB233780  | 406         | HQ645587  | 2940       |
| <i>Euphorbia_johnstonii</i>        | 0           | -          | 1203        | HQ645742  | 386         | HQ645592  | 1589       |
| <i>Euphorbia_kuwaleana</i>         | 0           | -          | 1203        | HQ645743  | 1048        | MH490361  | 2251       |
| <i>Euphorbia_leucocephala</i>      | 1300        | JN249340   | 637         | GU214862  | 978         | JN249672  | 2915       |
| <i>Euphorbia_neocrispa</i>         | 1324        | AB267958   | 1224        | AB268062  | 0           | -         | 2548       |
| <i>Euphorbia_olowaluana</i>        | 0           | -          | 1203        | HQ645766  | 1042        | MH490363  | 2245       |
| <i>Euphorbia_rockii</i>            | 0           | -          | 1004        | HQ645791  | 1022        | MH490489  | 2026       |
| <i>Euphorbia_tithymaloides</i>     | 1331        | AB267959   | 1203        | AB268063  | 0           | -         | 2534       |
| <i>Excoecaria_cochinchinensis</i>  | 1331        | AB233885   | 1203        | AB233781  | 959         | AY794619  | 3493       |
| <i>Fontainea_venosa</i>            | 1324        | AB233878   | 1203        | AB233774  | 872         | AY794708  | 3399       |
| <i>Glycydendron_amazonicum</i>     | 1324        | AB267942   | 1209        | AB268046  | 964         | AY794681  | 3497       |
| <i>Hevea_brasiliensis</i>          | 1316        | NC_15308   | 1197        | NC_15308  | 988         | NC_15308  | 3501       |
| <i>Hippomane_mancinella</i>        | 1324        | AB267956   | 1203        | AB268060  | 983         | AY794616  | 3510       |
| <i>Homalanthus_nutans</i>          | 1331        | AB267957   | 1203        | AB268061  | 961         | JN249590  | 3495       |
| <i>Homalanthus_populifolius</i>    | 572         | KM392269   | 757         | KM392242  | 0           | -         | 1329       |
| <i>Humiria_balsamifera</i>         | 1324        | AB233889   | 1197        | AB233785  | 0           | -         | 2521       |
| <i>Hura_crepitans</i>              | 1331        | AB233886   | 1203        | AB233782  | 984         | AY794636  | 3518       |
| <i>Irvingia_malayana</i>           | 1331        | AB233892   | 1195        | AB233788  | 0           | -         | 2526       |
| <i>Jatropha_integerrima</i>        | 1331        | AB233879   | 1215        | AB233775  | 1034        | AY794685  | 3580       |
| <i>Jatropha_multifida</i>          | 687         | KP898357   | 749         | LC461834  | 937         | KP868720  | 2373       |
| <i>Jatropha_curcas</i>             | 1315        | NC_12224   | 1212        | NC_12224  | 1024        | NC_12224  | 3551       |
| <i>Klaineanthus_gaboniae</i>       | 1331        | AB267944   | 1203        | AB268048  | 887         | AY794668  | 3421       |
| <i>Lasiocroton_macrophyllus</i>    | 1324        | AB267919   | 1203        | AB268023  | 0           | -         | 2527       |
| <i>Lasiocroton_microphyllus</i>    | 1320        | AB267920   | 1203        | AB268024  | 990         | HG971893  | 3513       |
| <i>Lobanilia_bakeriana</i>         | 1324        | AB267921   | 1209        | AB268025  | 1022        | AY794779  | 3555       |
| <i>Macaranga_aleuritoides</i>      | 1331        | AB267922   | 1203        | AB268026  | 988         | Q899191   | 3522       |
| <i>Macaranga_tanarius</i>          | 1331        | MW297079   | 1203        | MW297079  | 994         | MW297079  | 3528       |
| <i>Mallotus_japonicus</i>          | 1309        | MW244068   | 1203        | MW244068  | 990         | MW244068  | 3502       |
| <i>Manihot_carthagensis</i>        | 1331        | MK430314.1 | 0           | -         | 964         | EU518901  | 2295       |
| <i>Manihot_esculenta</i>           | 1313        | NC_10433   | 1209        | NC_10433  | 1000        | NC_10433  | 3522       |
| <i>Mareya_micrantha</i>            | 1324        | AB267924   | 1197        | AB268028  | 1026        | AY794774  | 3547       |
| <i>Melanolepis_multiglandulosa</i> | 1331        | AB267925   | 1203        | AB268029  | 988         | AY794733  | 3522       |
| <i>Mercurialis_leiocarpa</i>       | 1331        | AB233867   | 1203        | AB233763  | 0           | -         | 2534       |
| <i>Micrandra_spruceana</i>         | 1323        | AB267945   | 1212        | AB268049  | 0           | -         | 2535       |

| Species                            | rbcL        |            | matK        |            | trnL        |           | Total (bp) |
|------------------------------------|-------------|------------|-------------|------------|-------------|-----------|------------|
|                                    | Length (bp) | Accession  | Length (bp) | Accession  | Length (bp) | Accession |            |
| <i>Micrandropsis scleroxylon</i>   | 1321        | AB267946   | 1206        | AB268050   | 0           | -         | 2527       |
| <i>Necepsia afzelii</i>            | 1324        | AB233868   | 1203        | AB233764   | 986         | DQ991514  | 3513       |
| <i>Neoboutonia mannii</i>          | 1324        | AB233881   | 1215        | AB233777   | 889         | AY794723  | 3428       |
| <i>Neoscortechinia forbesii</i>    | 1322        | AB267911   | 1197        | AB268015   | 0           | -         | 2519       |
| <i>Neoscortechinia kingii</i>      | 1322        | AB267912   | 1203        | AB268016   | 971         | AY794806  | 3496       |
| <i>Ophellantha spinosa</i>         | 1324        | AB267947   | 1209        | AB268051   | 685         | AY971344  | 3218       |
| <i>Ostodes paniculata</i>          | 1322        | AB267948   | 1215        | AB268052   | 881         | AY794725  | 3418       |
| <i>Paranecepsia alchorneifolia</i> | 1315        | AB267926   | 1203        | AB268030   | 0           | -         | 2518       |
| <i>Philyra brasiliensis</i>        | 1324        | AB267927   | 1209        | AB268031   | 1001        | AY794740  | 3534       |
| <i>Pimelodendron griffithianum</i> | 1331        | AB233887   | 1187        | AB233783   | 0           | -         | 2518       |
| <i>Plukenetia polyadenia</i>       | 1324        | AB267928   | 1194        | AB268032   | 0           | -         | 2518       |
| <i>Pycnocomma cornuta</i>          | 1324        | AB233870   | 1203        | AB233766   | 0           | -         | 2527       |
| <i>Ricinocarpos pinifolius</i>     | 1324        | AB267949   | 1212        | AB268053   | 0           | -         | 2536       |
| <i>Ricinus communis</i>            | 1331        | NC_16736   | 1203        | NC_16736   | 981         | NC_16736  | 3515       |
| <i>Romanoa tamnoides</i>           | 1320        | AB233872   | 1194        | AB233768   | 1037        | Y794757   | 3551       |
| <i>Sacoglottis sp.</i>             | 1323        | AB233890   | 1197        | AB233786   | 0           | -         | 2520       |
| <i>Schinziophyton rautanenii</i>   | 1324        | AB233882   | 1215        | AB233778   | 0           | -         | 2539       |
| <i>Seidelia triandra</i>           | 1324        | AB267929   | 1203        | AB268033   | 983         | AY794762  | 3510       |
| <i>Speranskia cantonensis</i>      | 1326        | AB267930   | 1203        | AB268034   | 1025        | AY794735  | 3554       |
| <i>Spirostachys africana</i>       | 1324        | AB267960   | 1203        | AB268064   | 977         | Y794621   | 3504       |
| <i>Sumbaviopsis albicans</i>       | 1324        | AB267931   | 1209        | AB268035   | 986         | Y794732   | 3519       |
| <i>Suregada aequorea</i>           | 1331        | AB267950   | 1203        | AB268054   | 0           | -         | 2534       |
| <i>Suregada glomerulata</i>        | 1331        | AB267951   | 1203        | AB268055   | 0           | -         | 2534       |
| <i>Tetrorchidium rubrivenium</i>   | 1315        | AB267952   | 1212        | AB268056   | 0           | -         | 2527       |
| <i>Tragia betonicifolia</i>        | 1324        | AB267932   | 1194        | AB268036   | 0           | -         | 2518       |
| <i>Tragiella anomala</i>           | 1324        | AB267933   | 1194        | AB268037   | 1032        | AY794753  | 3550       |
| <i>Triadica sebifera</i>           | 1331        | AB267961   | 1209        | AB268065   | 1021        | Y794649   | 3561       |
| <i>Trigonopleura malayana</i>      | 1331        | AB233873   | 1194        | AB233769   | 0           | -         | 2525       |
| <i>Vernicia montana</i>            | 1316        | MW297080.1 | 1215        | MW297080.1 | 1049        | MW297080  | 3580       |
| <i>Vernicia fordii</i>             | 1301        | KY628420   | 0           | -          | 0           | -         | 1301       |
| <i>Wetria insignis</i>             | 1324        | AB267934   | 1203        | AB268038   | 0           | -         | 2527       |



**Table S3. Environmental variables correlated to PCA axes (trees only)**

|                                          | Correlation Coefficient | <i>p</i> -value |
|------------------------------------------|-------------------------|-----------------|
| <b>Dim 1</b>                             |                         |                 |
| Temperature of the Wettest Quarter       | 0.8690961               | 2.699026e-83    |
| Minimum Temperature of the Coldest Month | 0.8645576               | 1.826855e-81    |
| Vegetation Cover                         | 0.7552094               | 1.035758e-50    |
| Precipitation of the Driest Month        | 0.3539213               | 2.508441e-09    |
| Climatic Water Deficit                   | 0.2165732               | 3.551292e-04    |
| Precipitation Seasonality                | -0.2360332              | 9.570400e-05    |
| Solar Radiation                          | -0.7002899              | 7.997929e-41    |
| <b>Dim 2</b>                             |                         |                 |
| Precipitation Seasonality                | 0.7008964               | 6.400334e-41    |
| Climatic Water Deficit                   | 0.6665530               | 8.467696e-36    |
| Minimum Temperature of the Coldest Month | 0.4632755               | 1.155631e-15    |
| Temperature of the Wettest Quarter       | 0.4485016               | 1.144784e-14    |
| Solar Radiation                          | 0.4037758               | 6.238385e-12    |
| Vegetation Cover                         | -0.2841251              | 2.274431e-06    |
| Precipitation of the Driest Month        | -0.7682722              | 1.856038e-53    |
| <b>Dim 3</b>                             |                         |                 |
| Climatic Water Deficit                   | 0.6439586               | 8.730307e-33    |
| Precipitation of the Driest Month        | 0.2994582               | 5.898452e-07    |
| Solar Radiation                          | 0.2484549               | 3.904704e-05    |
| Vegetation Cover                         | -0.2703221              | 7.171872e-06    |
| Precipitation Seasonality                | -0.5406903              | 9.516836e-22    |

**Table S4. Environmental variables correlated to PCA axes (all lifeforms)**

|                                          | Correlation Coefficient | <i>p</i> -value |
|------------------------------------------|-------------------------|-----------------|
| <b>Dim 1</b>                             |                         |                 |
| Minimum Temperature of the Coldest Month | 0.85293675              | 2.680179e-180   |
| Temperature of the Wettest Quarter       | 0.83826172              | 2.393567e-168   |
| Climatic Water Deficit                   | 0.68588944              | 3.621171e-89    |
| Precipitation Seasonality                | 0.54686588              | 1.186145e-50    |
| Solar Radiation                          | 0.09338178              | 1.877688e-02    |
| Precipitation of the Driest Month        | -0.56734656             | 3.336257e-55    |
| <b>Dim 2</b>                             |                         |                 |
| Vegetation Cover                         | 0.8112428               | 3.399612e-149   |
| Precipitation of the Driest Month        | 0.5943777               | 1.014873e-61    |
| Temperature of the Wettest Quarter       | 0.5000729               | 2.339880e-41    |
| Minimum Temperature of the Coldest Month | 0.4872993               | 4.629512e-39    |
| Climatic Water Deficit                   | -0.1930343              | 9.924023e-07    |
| Precipitation Seasonality                | -0.4538317              | 1.745728e-33    |
| Solar Radiation                          | -0.8088022              | 1.283092e-147   |
| <b>Dim 3</b>                             |                         |                 |
| Climatic Water Deficit                   | 0.6144706               | 5.582018e-67    |
| Precipitation of the Driest Month        | 0.3464571               | 2.731684e-19    |
| Solar Radiation                          | 0.1234679               | 1.857199e-03    |
| Vegetation Cover                         | -0.3262061              | 3.687601e-17    |
| Precipitation Seasonality                | -0.5495276              | 3.165038e-51    |
| <b>Dim 4</b>                             |                         |                 |
| Solar Radiation                          | 0.51276391              | 9.761776e-44    |
| Vegetation Cover                         | 0.35460097              | 3.425228e-20    |
| Climatic Water Deficit                   | -0.09449286             | 1.740606e-02    |
| Precipitation of the Driest Month        | -0.14115937             | 3.675769e-04    |
| Precipitation Seasonality                | -0.28336754             | 3.738228e-13    |

**Table S5. Soil variables correlated to PCA axes (trees only)**

|                          | Correlation Coefficient | <i>p</i> -value |
|--------------------------|-------------------------|-----------------|
| <b>Dim 1</b>             |                         |                 |
| Organic Matter           | 0.8703556               | 2.11E-51        |
| Water Permeability       | 0.6360706               | 7.30E-20        |
| Shrink-Swell Potential   | -0.4565908              | 9.02E-10        |
| pH                       | -0.6425377              | 2.35E-20        |
| <b>Dim 2</b>             |                         |                 |
| Cation Exchange Capacity | 0.8675693               | 1.04E-50        |
| Water Permeability       | 0.5182415               | 1.39E-12        |
| pH                       | 0.5162413               | 1.75E-12        |
| Shrink-Swell Potential   | 0.418833                | 2.63E-08        |
| Organic Matter           | 0.1848592               | 1.82E-02        |
| <b>Dim 3</b>             |                         |                 |
| Shrink-Swell Potential   | 0.7374708               | 3.06E-29        |
| Organic Matter           | 0.2214541               | 4.50E-03        |
| Water Permeability       | -0.2365187              | 2.37E-03        |
| pH                       | -0.4576132              | 8.18E-10        |
| <b>Dim 4</b>             |                         |                 |
| Water Permeability       | 0.494389                | 1.98E-11        |
| Shrink-Swell Potential   | 0.2666742               | 5.80E-04        |
| Cation Exchange Capacity | -0.4585921              | 7.45E-10        |
